# Supplementary material for: Variability, Expression, and Methylation of IL-6 and IL-8 Genes in Bladder Cancer Pathophysiology
Source: MDPI journal article supplement (doi:10.3390/ijms24076266), 2023-03-27
Supplement: s1 [file s1]

## Supplementary materials

**Table S1.** Gene–gene interactions of *IL-6* and *IL-8* polymorphisms and BC risk.

| Combined genotype                                                                          | Control (n = 114) |           | BC (n = 116) |           | Crude OR (95% CI)*  | <i>p</i> | Adjusted OR (95% CI)* | <i>p</i> * |
|--------------------------------------------------------------------------------------------|-------------------|-----------|--------------|-----------|---------------------|----------|-----------------------|------------|
|                                                                                            | Number            | Frequency | Number       | Frequency |                     |          |                       |            |
| <b>-597 A&gt;G – <i>IL-6</i> (rs1800797) and c.+396 T&gt;G – <i>IL-8</i> (rs2227307)</b>   |                   |           |              |           |                     |          |                       |            |
| A/A-T/T                                                                                    | 4                 | 0.035     | 9            | 0.078     | 1.615 (0.512-5.093) | 0.414    | 1.662 (0.525-5.267)   | 0.388      |
| A/A-T/G                                                                                    | 11                | 0.096     | 11           | 0.095     | 1.346 (0.544-3.330) | 0.520    | 1.316 (0.531-3.266)   | 0.553      |
| A/A-G/G                                                                                    | 8                 | 0.070     | 4            | 0.034     | 0.417 (0.125-1.394) | 0.155    | 0.434 (0.129-1.460)   | 0.178      |
| A/G-T/T                                                                                    | 12                | 0.105     | 16           | 0.138     | 0.732 (0.345-1.553) | 0.416    | 0.715 (0.336-1.521)   | 0.384      |
| A/G-T/G                                                                                    | 33                | 0.289     | 33           | 0.284     | 0.976 (0.548-1.738) | 0.935    | 0.991 (0.555-1.768)   | 0.975      |
| A/G-G/G                                                                                    | 13                | 0.114     | 12           | 0.103     | 1.968 (0.800-4.842) | 0.141    | 1.972 (0.800-4.862)   | 0.140      |
| G/G-T/T                                                                                    | 11                | 0.096     | 5            | 0.043     | 2.037 (0.596-6.964) | 0.257    | 2.062 (0.601-7.074)   | 0.250      |
| G/G-T/G                                                                                    | 17                | 0.149     | 17           | 0.147     | 0.807 (0.399-1.634) | 0.552    | 0.803 (0.396-1.628)   | 0.543      |
| G/G-G/G                                                                                    | 5                 | 0.044     | 9            | 0.078     | 0.636 (0.219-1.850) | 0.406    | 0.611 (0.209-1.785)   | 0.368      |
| <b>c.+396 T&gt;G – <i>IL-8</i> (rs2227307) and c.3331 G&gt;A – <i>IL-6</i> (rs2069845)</b> |                   |           |              |           |                     |          |                       |            |
| T/T-G/G                                                                                    | 4                 | 0.035     | 9            | 0.078     | 2.313 (0.691-7.737) | 0.173    | 2.264 (0.675-7.594)   | 0.186      |
| T/T-G/A                                                                                    | 12                | 0.105     | 15           | 0.129     | 1.262 (0.563-2.830) | 0.572    | 1.227 (0.545-2.759)   | 0.621      |
| T/T-A/A                                                                                    | 11                | 0.096     | 6            | 0.052     | 0.511 (0.182-1.431) | 0.201    | 0.535 (0.190-1.507)   | 0.236      |
| T/G-G/G                                                                                    | 14                | 0.123     | 12           | 0.103     | 0.824 (0.364-1.868) | 0.643    | 0.823 (0.362-1.870)   | 0.642      |
| T/G-G/A                                                                                    | 31                | 0.272     | 35           | 0.302     | 1.157 (0.653-2.050) | 0.618    | 1.171 (0.659-2.079)   | 0.591      |
| T/G-A/A                                                                                    | 16                | 0.140     | 14           | 0.121     | 0.841 (0.390-1.814) | 0.658    | 0.827 (0.382-1.789)   | 0.630      |
| G/G-G/G                                                                                    | 8                 | 0.070     | 4            | 0.034     | 0.473 (0.138-1.618) | 0.233    | 0.462 (0.135-1.586)   | 0.220      |
| G/G-G/A                                                                                    | 13                | 0.114     | 13           | 0.112     | 0.981 (0.433-2.218) | 0.962    | 0.980 (0.432-2.222)   | 0.962      |
| G/G-A/A                                                                                    | 5                 | 0.044     | 8            | 0.069     | 1.615 (0.512-5.093) | 0.414    | 1.662 (0.525-5.267)   | 0.388      |

**Table S2.** Synergy factor analysis.

| Genes                     | Polymorphism                                    | Subjects                | Synergy factor <sup>a</sup> | <i>p</i> -value <sup>b</sup> | Type interaction <sup>a</sup> |
|---------------------------|-------------------------------------------------|-------------------------|-----------------------------|------------------------------|-------------------------------|
| <i>IL-6</i> × <i>IL-8</i> | -597 A>G (rs1800797) × c.+396 T>G (rs2227307)   | G carriers – G carriers | 3.259                       | 0.127                        | Antagonistic                  |
| <i>IL-8</i> × <i>IL-6</i> | c.+396 T>G (rs2227307) × c.3331 G>A (rs2069845) | G carriers – A carriers | 3.649                       | 0.092                        | Antagonistic                  |

**Table S3.** Distribution of haplotypes of the studied polymorphisms of the *IL-6* and risk of the BC.

| Haplotype                                                                  | Control (n = 114) |           | BC (n = 116) |           | Crude OR (95% CI)   | p     |
|----------------------------------------------------------------------------|-------------------|-----------|--------------|-----------|---------------------|-------|
|                                                                            | Number            | Frequency | Number       | Frequency |                     |       |
| <b>-597 A&gt;G – IL-6 (rs1800797) and c.3331 G&gt;A – IL-6 (rs2069845)</b> |                   |           |              |           |                     |       |
| AG                                                                         | 104               | 0.456     | 107          | 0.461     | 1.02 (0.707-1.472)  | 0.913 |
| GA                                                                         | 120               | 0.526     | 117          | 0.504     | 0.915 (0.635-1.32)  | 0.636 |
| GG                                                                         | 4                 | 0.017     | 6            | 0.025     | 1.486 (0.413-5.339) | 0.540 |
| AA                                                                         | 0                 | 0.000     | 2            | 0.008     | -                   | -     |

**Table S4.** Correlations between studied SNPs and the clinical characteristics of patients with BC.

| <b>-597 A&gt;G – <i>IL-6</i> (rs1800797)</b> |                                                                    |                    |       |       |          |          |
|----------------------------------------------|--------------------------------------------------------------------|--------------------|-------|-------|----------|----------|
| Characteristics                              | Status                                                             | Genotype Frequency |       |       | $\chi^2$ | <i>p</i> |
|                                              |                                                                    | AA                 | AG    | GG    |          |          |
| Primary tumour size                          | Ta                                                                 | 0.389              | 0.431 | 0.375 | 3.346    | 0.502    |
|                                              | T1                                                                 | 0.389              | 0.353 | 0.541 |          |          |
|                                              | ≥T2                                                                | 0.222              | 0.216 | 0.125 |          |          |
| Lymph node metastasis                        | N0                                                                 | 0.778              | 0.784 | 0.917 | 2.146    | 0.342    |
|                                              | ≥N1                                                                | 0.222              | 0.216 | 0.083 |          |          |
| Distant metastasis                           | M0                                                                 | 0.778              | 0.784 | 0.917 | 2.146    | 0.342    |
|                                              | M1                                                                 | 0.222              | 0.216 | 0.083 |          |          |
| Pathomorphology of nonmuscle-invasive tumors | papillary urothelial neoplasm of low malignant potential (PUN-LMP) | 0.250              | 0.222 | 0.080 | 2.967    | 0.563    |

|                                              |                                                                    |                                           |       |       |          |          |  |
|----------------------------------------------|--------------------------------------------------------------------|-------------------------------------------|-------|-------|----------|----------|--|
|                                              |                                                                    | low-grade papillary urothelial carcinoma  | 0.375 | 0.408 | 0.440    |          |  |
|                                              |                                                                    | high-grade papillary urothelial carcinoma | 0.375 | 0.370 | 0.480    |          |  |
| c.3331 G>A – IL-6 (rs2069845)                |                                                                    |                                           |       |       |          |          |  |
| Characteristics                              | Status                                                             | Genotype Frequency                        |       |       | $\chi^2$ | <i>p</i> |  |
|                                              |                                                                    | GG                                        | GA    | AA    |          |          |  |
| Primary tumour size                          | Ta                                                                 | 0.368                                     | 0.423 | 0.409 | 2.128    | 0.712    |  |
|                                              | T1                                                                 | 0.421                                     | 0.365 | 0.500 |          |          |  |
|                                              | ≥T2                                                                | 0.211                                     | 0.212 | 0.091 |          |          |  |
| Lymph node metastasis                        | N0                                                                 | 0.789                                     | 0.788 | 0.212 | 1.629    | 0.443    |  |
|                                              | ≥N1                                                                | 0.211                                     | 0.909 | 0.091 |          |          |  |
| Distant metastasis                           | M0                                                                 | 0.789                                     | 0.788 | 0.212 | 1.629    | 0.443    |  |
|                                              | M1                                                                 | 0.211                                     | 0.909 | 0.091 |          |          |  |
| Pathomorphology of nonmuscle-invasive tumors | papillary urothelial neoplasm of low malignant potential (PUN-LMP) | 0.240                                     | 0.232 | 0.045 | 4.261    | 0.372    |  |
|                                              | low-grade papillary urothelial carcinoma                           | 0.360                                     | 0.411 | 0.455 |          |          |  |
|                                              | high-grade papillary urothelial carcinoma                          | 0.400                                     | 0.357 | 0.500 |          |          |  |
| c.+396 T>G – IL-8 (rs2227307)                |                                                                    |                                           |       |       |          |          |  |
| Characteristics                              | Status                                                             | Genotype Frequency                        |       |       | $\chi^2$ | <i>p</i> |  |
|                                              |                                                                    | TT                                        | TG    | GG    |          |          |  |
| Primary tumour size                          | Ta                                                                 | 0.346                                     | 0.396 | 0.526 | 3.211    | 0.523    |  |
|                                              | T1                                                                 | 0.423                                     | 0.396 | 0.421 |          |          |  |
|                                              | ≥T2                                                                | 0.231                                     | 0.208 | 0.053 |          |          |  |
| Lymph node metastasis                        | N0                                                                 | 0.769                                     | 0.792 | 0.947 | 2.765    | 0.251    |  |
|                                              | ≥N1                                                                | 0.231                                     | 0.208 | 0.053 |          |          |  |
| Distant metastasis                           | M0                                                                 | 0.769                                     | 0.792 | 0.947 | 2.765    | 0.251    |  |
|                                              | M1                                                                 | 0.231                                     | 0.208 | 0.053 |          |          |  |
| Pathomorphology of nonmuscle-invasive tumors | papillary urothelial neoplasm of low malignant potential (PUN-LMP) | 0.148                                     | 0.226 | 0.174 | 2.171    | 0.704    |  |
|                                              | low-grade papillary urothelial carcinoma                           | 0.519                                     | 0.359 | 0.391 |          |          |  |
|                                              | high-grade papillary urothelial carcinoma                          | 0.333                                     | 0.415 | 0.435 |          |          |  |

**Table S5.** Distribution of genotypes and alleles of the -597 A>G – *IL-6* (rs1800797), c.3331 G>A – *IL-6* (rs2069845), c.+396 T>G – *IL-8* (rs2227307) and ORs with 95% CIs in men and women with BC.

| Genotype/<br>Allele                     | WOMEN (n = 71)               |            |                      |       | MEN (n = 159)                 |            |                     |       |
|-----------------------------------------|------------------------------|------------|----------------------|-------|-------------------------------|------------|---------------------|-------|
|                                         | Control                      | BC         | Crude OR (95% CI)*   | p     | Control                       | BC         | Crude OR (95% CI)*  | p     |
|                                         | (n = 39)                     | (n = 32)   |                      |       | (n = 75)                      | (n = 84)   |                     |       |
|                                         | N (Freq.)                    | N (Freq.)  |                      |       | N (Freq.)                     | N (Freq.)  |                     |       |
| <b>-597 A&gt;G – IL-6 (rs1800797)</b>   |                              |            |                      |       |                               |            |                     |       |
| A/A                                     | 7 (0.179)                    | 5 (0.156)  | 0.847(0.241-2.975)   | 0.795 | 16 (0.213)                    | 19 (0.226) | 1.078 (0.508-2.288) | 0.845 |
| A/G                                     | 17 (0.436)                   | 20 (0.625) | 2.157 (0.830-5.607)  | 0.115 | 41 (0.547)                    | 41 (0.488) | 0.791 (0.424-1.476) | 0.461 |
| G/G                                     | 15 (0.385)                   | 7 (0.219)  | 0.448 (0.156-1.290)  | 0.137 | 18 (0.240)                    | 24 (0.286) | 1.267 (0.622-2.578) | 0.514 |
|                                         | $\chi^2 = 70.955; p = 0.380$ |            |                      |       | $\chi^2 = 158.999; p = 0.418$ |            |                     |       |
| A                                       | 31 (0.397)                   | 30 (0.469) | 1.367 (0.681-2.745)  | 0.379 | 73 (0.487)                    | 79 (0.470) | 0.934 (0.596-1.463) | 0.766 |
| G                                       | 47 (0.603)                   | 34 (0.531) | 0.732 (0.364-1.469)  | 0.379 | 77 (0.513)                    | 89 (0.530) | 1.071 (0.684-1.676) | 0.766 |
| <b>c.3331 G&gt;A – IL-6 (rs2069845)</b> |                              |            |                      |       |                               |            |                     |       |
| G/G                                     | 8 (0.205)                    | 6 (0.188)  | 0.894 (0.275-2.910)  | 0.853 | 18 (0.240)                    | 19 (0.226) | 0.926 (0.443-1.933) | 0.837 |
| G/A                                     | 17 (0.436)                   | 19 (0.594) | 1.891 (0.733-4.880)  | 0.188 | 39 (0.520)                    | 44 (0.524) | 1.015 (0.544-1.894) | 0.962 |
| A/A                                     | 14 (0.359)                   | 7 (0.219)  | 0.500 (0.173-1.1448) | 0.201 | 18 (0.240)                    | 21 (0.250) | 1.056 (0.512-2.178) | 0.884 |
|                                         | $\chi^2 = 70.971; p = 0.379$ |            |                      |       | $\chi^2 = 159.000; p = 0.418$ |            |                     |       |
| G                                       | 33 (0.423)                   | 31 (0.484) | 1.290 (0.655-2.539)  | 0.461 | 75 (0.500)                    | 82 (0.488) | 0.951 (0.606-1.493) | 0.828 |
| A                                       | 45 (0.577)                   | 33 (0.516) | 0.775 (0.294-1.526)  | 0.461 | 75 (0.500)                    | 86 (0.512) | 1.051 (0.670-1.649) | 0.828 |
| <b>c.+396 T&gt;G – IL-8 (rs2227307)</b> |                              |            |                      |       |                               |            |                     |       |
| T/T                                     | 9 (0.231)                    | 8 (0.250)  | 1.111 (0.372-3.315)  | 0.850 | 18 (0.240)                    | 22 (0.262) | 1.124 (0.547-2.307) | 0.751 |
| T/G                                     | 21 (0.538)                   | 17 (0.531) | 0.971 (0.381-2.480)  | 0.952 | 40 (0.533)                    | 44 (0.524) | 0.963 (0.516-1.796) | 0.904 |
| G/G                                     | 9 (0.231)                    | 7 (0.219)  | 0.933 (0.304-2.864)  | 0.904 | 17 (0.227)                    | 18 (0.214) | 0.930 (0.439-1.972) | 0.851 |
|                                         | $\chi^2 = 71.000; p = 0.378$ |            |                      |       | $\chi^2 = 159.000; p = 0.418$ |            |                     |       |
| T                                       | 39 (0.500)                   | 33 (0.516) | 1.017 (0.538-2.125)  | 0.848 | 76 (0.507)                    | 88 (0.524) | 1.076 (0.683-1.694) | 0.753 |
| G                                       | 39 (0.500)                   | 31 (0.484) | 0.935 (0.471-1.857)  | 0.848 | 74 (0.493)                    | 80 (0.476) | 0.930 (0.590-1.464) | 0.753 |

**Table S6.** Distribution of genotypes and alleles of the -597 A>G – *IL-6* (rs1800797), c.3331 G>A – *IL-6* (rs2069845), c.+396 T>G – *IL-8* (rs2227307) and ORs with 95% CIs in BC subjects with normal body weight or subjects with overweight and obesity.

| Genotype/<br>Allele                      | BMI < 25 (n = 81)            |            |                     |       | BMI ≤ 25 (n = 149)            |            |                     |       |
|------------------------------------------|------------------------------|------------|---------------------|-------|-------------------------------|------------|---------------------|-------|
|                                          | Control                      | BC         | Crude OR (95% CI)*  | p     | Control                       | BC         | Crude OR (95% CI)*  | p     |
|                                          | (n = 39)                     | (n = 42)   |                     |       | (n = 75)                      | (n = 74)   |                     |       |
|                                          | N (Freq.)                    | N (Freq.)  |                     |       | N (Freq.)                     | N (Freq.)  |                     |       |
| <b>-597 A&gt;G – IL-6 (rs1800797)</b>    |                              |            |                     |       |                               |            |                     |       |
| A/A                                      | 10 (0.256)                   | 4 (0.095)  | 0.305 (0.087-1.072) | 0.064 | 13 (0.173)                    | 20 (0.270) | 1.766 (0.803-3.884) | 0.157 |
| A/G                                      | 16 (0.410)                   | 26 (0.619) | 2.336 (0.958-5.697) | 0.062 | 42 (0.560)                    | 35 (0.473) | 0.705 (0.370-1.344) | 0.288 |
| G/G                                      | 13 (0.333)                   | 12 (0.286) | 0.800 (0.311-2.056) | 0.643 | 20 (0.267)                    | 19 (0.257) | 0.950 (0.457-1.973) | 0.891 |
|                                          | $\chi^2 = 81.011; p = 0.385$ |            |                     |       | $\chi^2 = 149.001; p = 0.416$ |            |                     |       |
| A                                        | 36 (0.462)                   | 34 (0.405) | 0.782 (0.410-1.490) | 0.454 | 68 (0.453)                    | 75 (0.507) | 1.250 (0.784-1.990) | 0.348 |
| G                                        | 42 (0.538)                   | 50 (0.595) | 1.279 (0.671-2.438) | 0.454 | 82 (0.547)                    | 73 (0.493) | 0.800 (0.502-1.275) | 0.348 |
| <b>c.3331 G&gt;A – IL-6 (rs2069845)</b>  |                              |            |                     |       |                               |            |                     |       |
| G/G                                      | 11 (0.282)                   | 6 (0.143)  | 0.424 (0.140-1.288) | 0.130 | 15 (0.200)                    | 19 (0.257) | 1.382 (0.640-2.983) | 0.410 |
| G/A                                      | 15 (0.385)                   | 25 (0.595) | 2.353 (0.964-5.742) | 0.060 | 41 (0.547)                    | 38 (0.514) | 0.875 (0.460-1.666) | 0.685 |
| A/A                                      | 13 (0.333)                   | 11 (0.262) | 0.710 (0.272-1.848) | 0.483 | 19 (0.253)                    | 17 (0.230) | 0.879 (0.415-1.863) | 0.737 |
|                                          | $\chi^2 = 81.005; p = 0.386$ |            |                     |       | $\chi^2 = 149.000; p = 0.416$ |            |                     |       |
| G                                        | 37 (0.474)                   | 37 (0.440) | 0.873 (0.470-1.620) | 0.666 | 71 (0.473)                    | 76 (0.514) | 1.187 (0.742-1.900) | 0.475 |
| A                                        | 41 (0.526)                   | 47 (0.560) | 1.146 (0.617-2.127) | 0.666 | 79 (0.527)                    | 72 (0.486) | 0.842 (0.526-1.348) | 0.475 |
| <b>c.+396 T&gt;G – IL-8 ( rs2227307)</b> |                              |            |                     |       |                               |            |                     |       |
| T/T                                      | 8 (0.205)                    | 10 (0.238) | 1.211 (0.423-3.470) | 0.722 | 19 (0.253)                    | 20 (0.270) | 1.092 (0.526-2.267) | 0.814 |
| T/G                                      | 19 (0.487)                   | 19 (0.452) | 0.870 (0.363-2.083) | 0.754 | 42 (0.560)                    | 42 (0.568) | 1.031 (0.540-1.971) | 0.926 |
| G/G                                      | 12 (0.308)                   | 13 (0.310) | 1.009 (0.393-2.591) | 0.986 | 14 (0.187)                    | 12 (0.162) | 0.843 (0.361-1.970) | 0.694 |
|                                          | $\chi^2 = 81.000; p = 0.386$ |            |                     |       | $\chi^2 = 149.000; p = 0.416$ |            |                     |       |
| T                                        | 35 (0.449)                   | 39 (0.464) | 1.061 (0.581-1.939) | 0.847 | 80 (0.533)                    | 82 (0.554) | 1.102 (0.674-1.800) | 0.699 |
| G                                        | 43 (0.551)                   | 45 (0.536) | 0.942 (0.516-1.722) | 0.847 | 70 (0.467)                    | 66 (0.446) | 0.908 (0.556-1.483) | 0.699 |

**Table S7.** Distribution of genotypes and alleles of the -597 A>G – *IL-6* (rs1800797), c.3331 G>A – *IL-6* (rs2069845), c.+396 T>G – *IL-8* (rs2227307) and ORs with 95% CIs in non-smokers and smokers with BC.

| Genotype/<br>Allele                      | NON-SMOKER (n = 104)          |            |                     |       | SMOKER (n = 126)              |            |                     |       |
|------------------------------------------|-------------------------------|------------|---------------------|-------|-------------------------------|------------|---------------------|-------|
|                                          | Control                       | BC         | Crude OR (95% CI)*  | p     | Control                       | BC         | Crude OR (95% CI)*  | p     |
|                                          | (n = 68)                      | (n = 36)   |                     |       | (n = 46)                      | (n = 80)   |                     |       |
|                                          | N (Freq.)                     | N (Freq.)  |                     |       | N (Freq.)                     | N (Freq.)  |                     |       |
| <b>-597 A&gt;G – IL-6 (rs1800797)</b>    |                               |            |                     |       |                               |            |                     |       |
| A/A                                      | 15 (0.221)                    | 11 (0.306) | 1.555 (0.625-3.869) | 0.343 | 8 (0.174)                     | 13 (0.163) | 0.922 (0.351-2.423) | 0.869 |
| A/G                                      | 32 (0.471)                    | 15 (0.417) | 0.804 (0.355-1.817) | 0.599 | 26 (0.565)                    | 46 (0.575) | 1.041 (0.500-2.165) | 0.915 |
| G/G                                      | 21 (0.309)                    | 10 (0.278) | 0.861 (0.353-2.101) | 0.742 | 12 (0.261)                    | 21 (0.263) | 1.008 (0.442-2.302) | 0.984 |
|                                          | $\chi^2 = 104.041; p = 0.398$ |            |                     |       | $\chi^2 = 126.000; p = 0.408$ |            |                     |       |
| A                                        | 62 (0.456)                    | 37 (0.514) | 1.237 (0.715-2.143) | 0.447 | 42 (0.457)                    | 72 (0.450) | 0.969 (0.554-1.697) | 0.913 |
| G                                        | 74 (0.544)                    | 35 (0.486) | 0.808 (0.467-1.399) | 0.477 | 50 (0.543)                    | 88 (0.550) | 1.032 (0.589-1.806) | 0.913 |
| <b>c.3331 G&gt;A – IL-6 (rs2069845)</b>  |                               |            |                     |       |                               |            |                     |       |
| G/G                                      | 17 (0.250)                    | 12 (0.333) | 1.500 (0.620-3.631) | 0.369 | 9 (0.196)                     | 13 (0.163) | 0.798 (0.312-2.042) | 0.637 |
| G/A                                      | 31 (0.456)                    | 17 (0.472) | 1.068 (0.475-2.400) | 0.874 | 25 (0.543)                    | 46 (0.575) | 1.136 (0.548-2.359) | 0.731 |
| A/A                                      | 20 (0.294)                    | 7 (0.194)  | 0.579 (0.218-1.538) | 0.273 | 12 (0.261)                    | 21 (0.263) | 1.008 (0.442-2.302) | 0.984 |
|                                          | $\chi^2 = 103.953; p = 0.400$ |            |                     |       | $\chi^2 = 126.004; p = 0.408$ |            |                     |       |
| G                                        | 65 (0.478)                    | 41 (0.569) | 1.410 (0.806-2.468) | 0.228 | 43 (0.467)                    | 72 (0.450) | 0.922 (0.530-1.604) | 0.774 |
| A                                        | 71 (0.522)                    | 31 (0.431) | 0.709 (0.405-1.241) | 0.228 | 49 (0.533)                    | 88 (0.550) | 1.084 (0.623-1.887) | 0.774 |
| <b>c.+396 T&gt;G – IL-8 ( rs2227307)</b> |                               |            |                     |       |                               |            |                     |       |
| T/T                                      | 14 (0.206)                    | 10 (0.278) | 1.484 (0.581-3.785) | 0.409 | 13 (0.283)                    | 20 (0.250) | 0.846 (0.374-1.916) | 0.689 |
| T/G                                      | 40 (0.588)                    | 19 (0.528) | 0.782 (0.347-1.764) | 0.554 | 21 (0.457)                    | 42 (0.525) | 1.316 (0.636-2.723) | 0.460 |
| G/G                                      | 14 (0.206)                    | 7 (0.194)  | 0.931 (0.338-2.565) | 0.890 | 12 (0.261)                    | 18 (0.225) | 0.823 (0.355-1.909) | 0.649 |
|                                          | $\chi^2 = 104.034; p = 0.398$ |            |                     |       | $\chi^2 = 126.000; p = 0.408$ |            |                     |       |
| T                                        | 68 (0.500)                    | 39 (0.542) | 1.214 (0.654-2.251) | 0.539 | 47 (0.511)                    | 82 (0.513) | 1.007 (0.603-1.682) | 0.980 |
| G                                        | 68 (0.500)                    | 33 (0.458) | 0.824 (0.444-1.528) | 0.539 | 45 (0.489)                    | 78 (0.488) | 0.993 (0.595-1.660) | 0.980 |

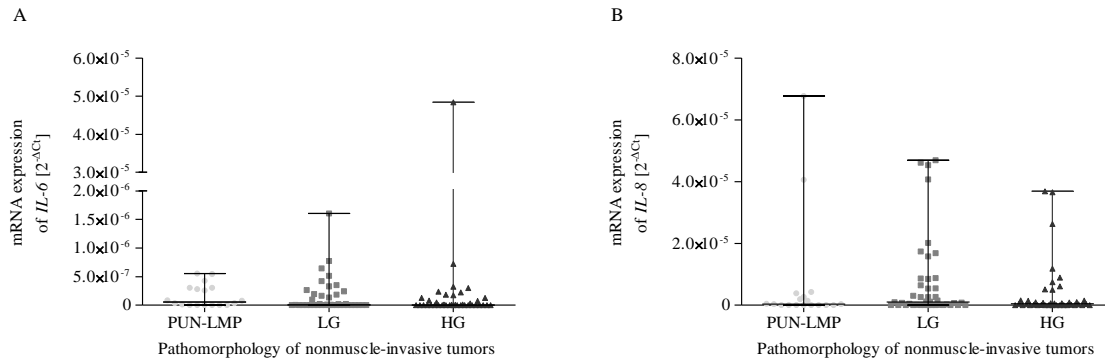

**Figure S1.** Basic *IL-6* (A) and *IL-8* (B) expression in the subgroups of the papillary urothelial neoplasm of low malignant potential (PUN-LMP), low-grade papillary urothelial carcinoma (LG), high-grade papillary urothelial carcinoma (HG), expressed as  $2^{-\Delta C_t}$  ( $C_{t \text{ gene}} - C_{t \text{ 18S}}$ ) method for each sample. The data are plotted as individual values and the median with interquartile range is indicated by the horizontal bars.

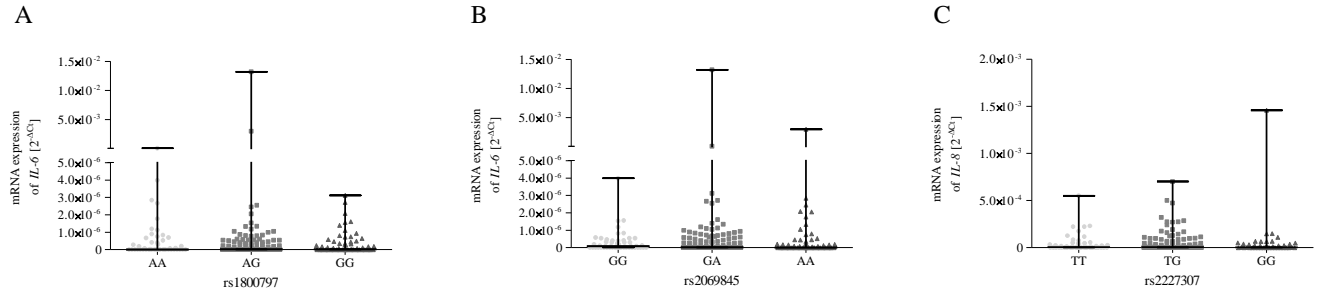

**Figure S2.** Distribution of single nucleotide polymorphisms of genes encoding *IL-6* (A, B) and *IL-8* (C) and mRNA expression level of *IL-6* and *IL-8* expressed as  $2^{-\Delta C_t}$  ( $C_{t \text{ gene}} - C_{t \text{ 18S}}$ ) method for each sample. The data are plotted as individual values and the median with interquartile range is indicated by the horizontal bars.

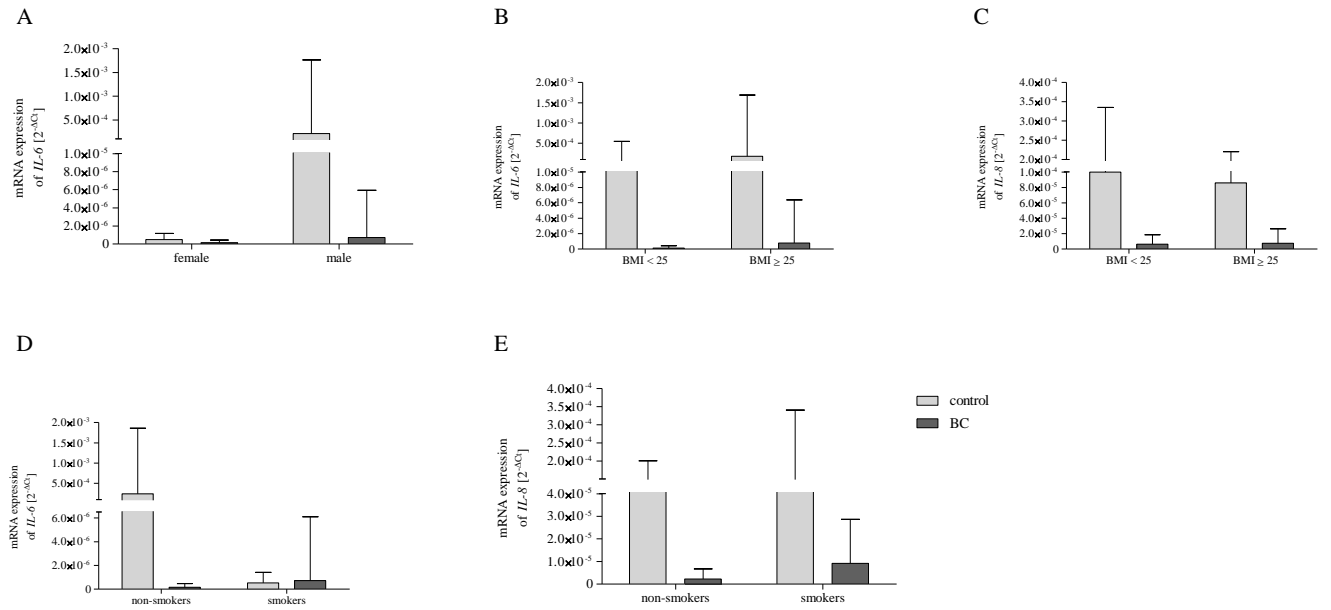

**Figure S3.** Two-way ANOVA with Bonferroni post hoc test show significant effects of BC and sex on *IL-6* expression (A), BMI on the mRNA expression of *IL-6* (B) and *IL-8* (C) as well as cigarette smoking on *IL-6* (D) and *IL-8* (E) expression. Gene expression in PBMCs has expressed as  $2^{-\Delta C_t}$  ( $C_{t \text{ gene}} - C_{t \text{ 18S}}$ ) method. The data are presented as mean  $\pm$  SD.

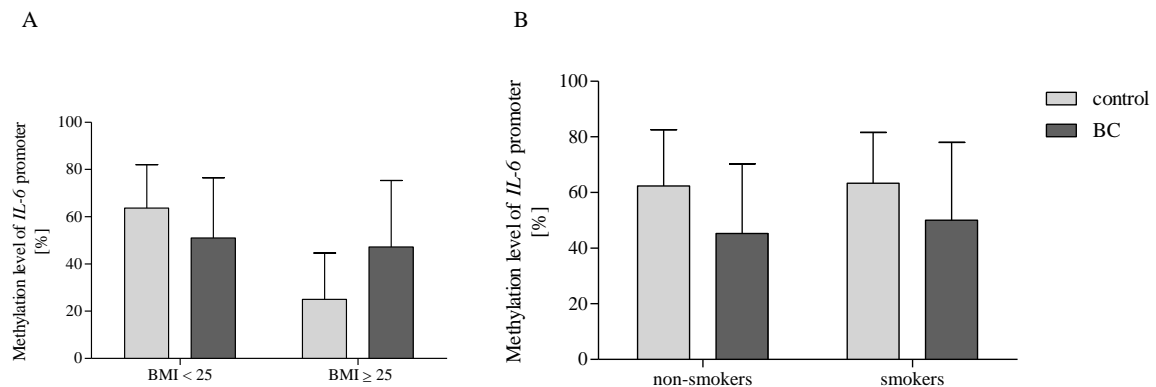

**Figure S4.** Two-way ANOVA with Bonferroni post hoc test show significant effects of BC and BMI (A) or cigarette smoking (B) on the methylation status of *IL-6* promoter region. The data are presented as mean  $\pm$  SD.
